# Supplementary material for: Distribution and prognostic significance of gluconeogenesis and glycolysis in lung cancer
Source: PubMed Central journal article supplement (PMC7607181; doi:10.1002/1878-0261.12780), 2020-09-01

Suppl. Figure 1

A

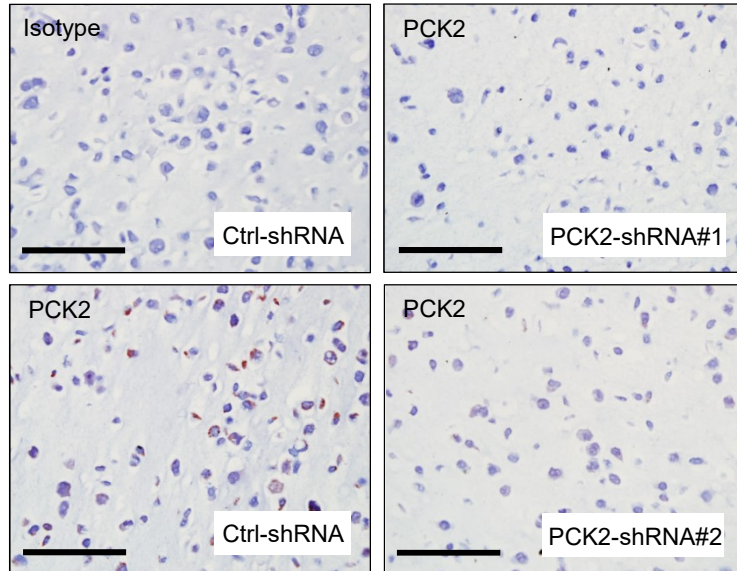

B

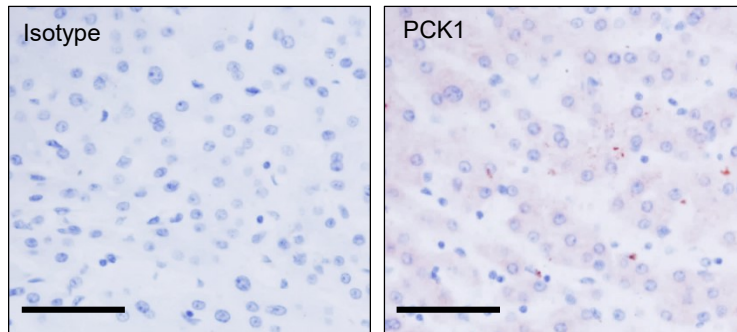

Suppl. Figure 2

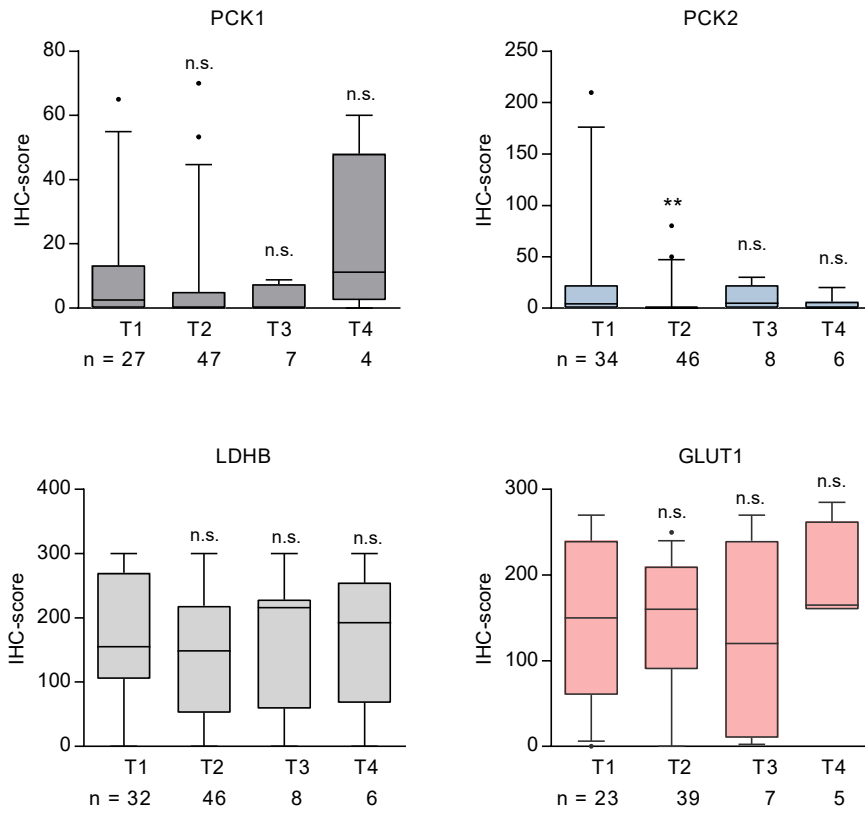

Suppl. Figure 3

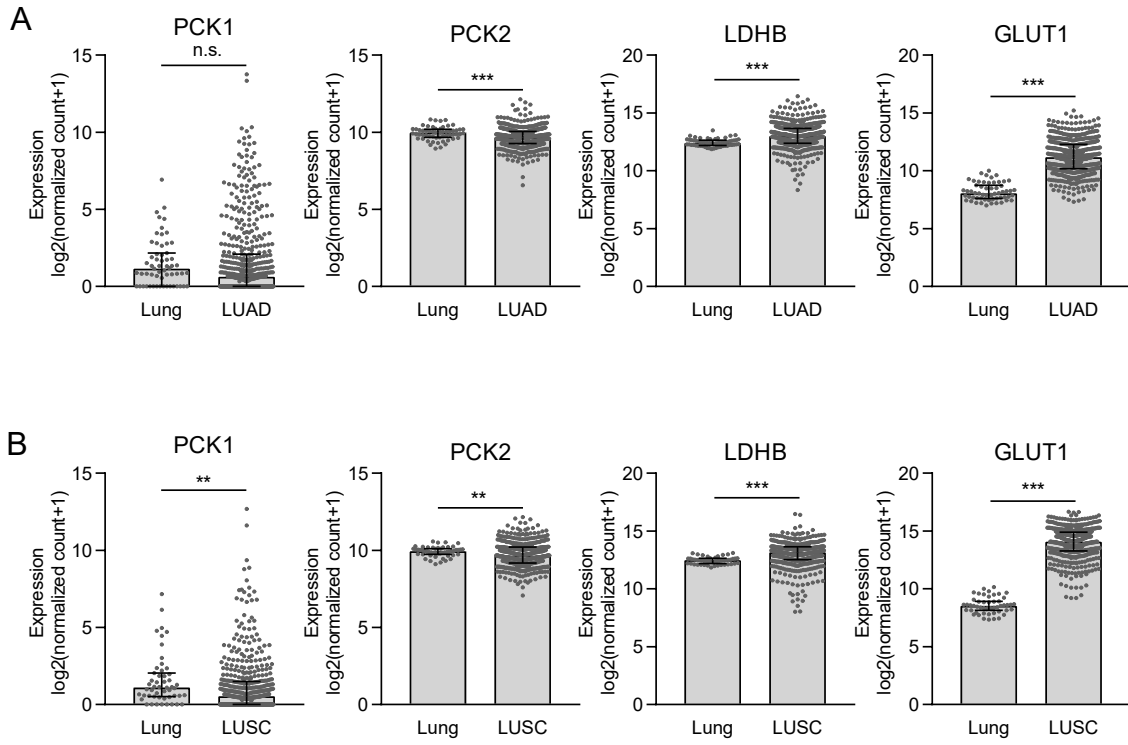

Suppl. Figure 4

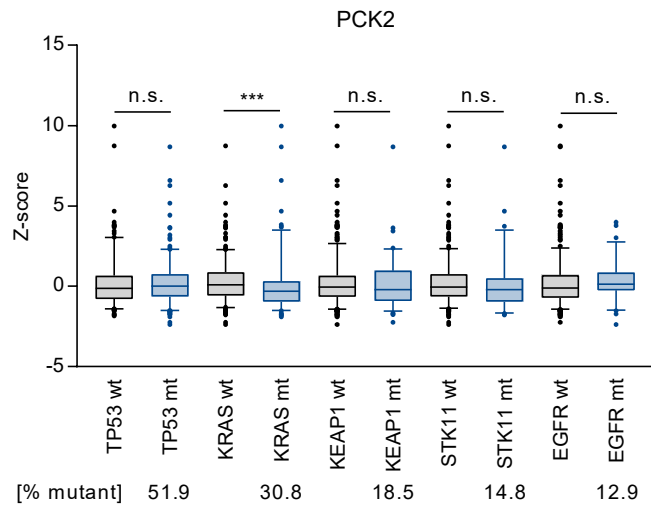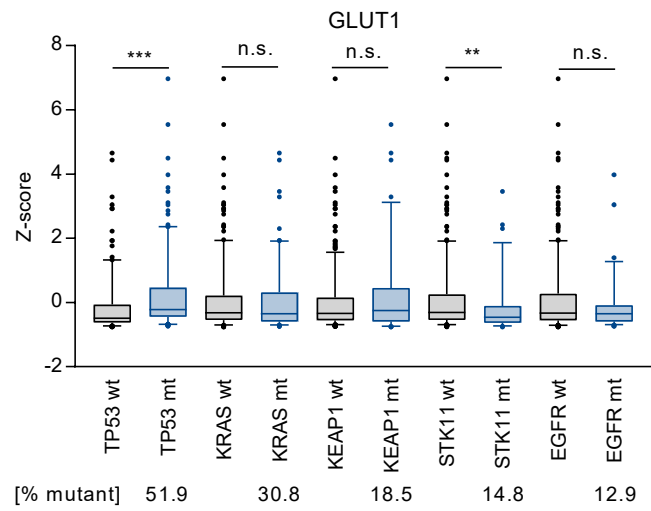

Suppl. Figure 5

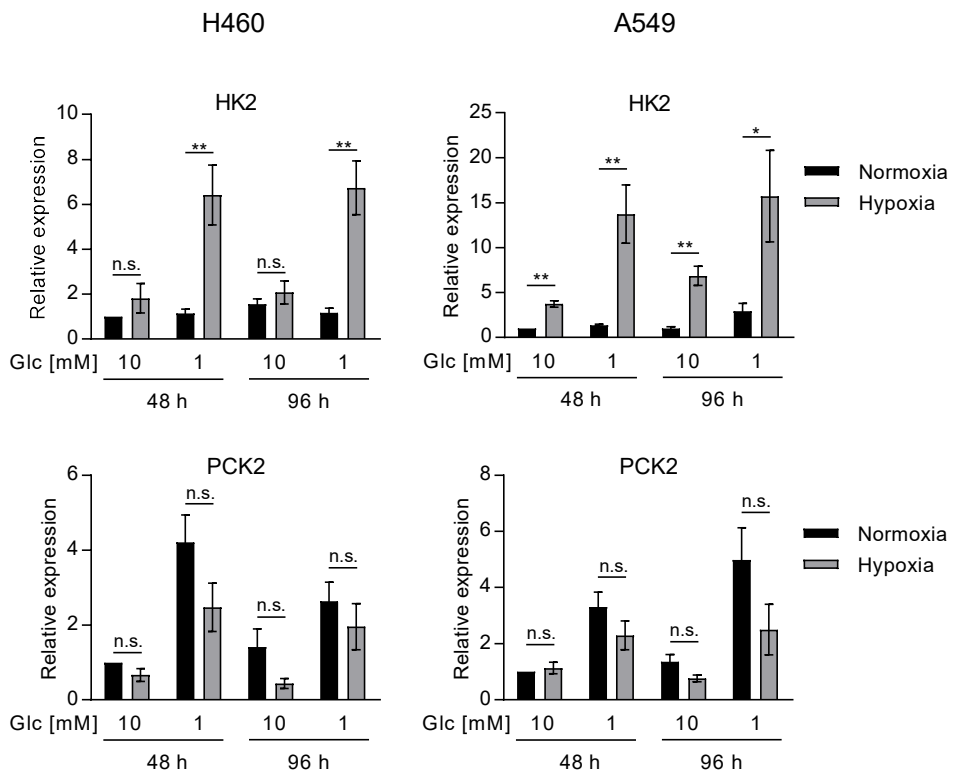

Supplement: MOL2-14-2853-s001.pdf [file MOL2-14-2853-s001.pdf]
